# Supplementary material for: Detection of seasonal cycles of erosion processes in a black marl gully froma time series of high-resolution digital elevation models (DEMs)
Source: Copernicus journal article supplement (doi:10.5194/esurf-4-781-2016), 2016-10-19
Supplement: Supplementary file 1 [file esurf-4-781-2016-supplement.zip]

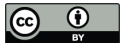

## *Supplement of*

# **Detection of seasonal cycles of erosion processes in a black marl gully from a time series of high-resolution digital elevation models (DEMs)**

**Jacques Bechet et al.**

*Correspondence to:* Michel Jaboyedoff ([michel.jaboyedoff@unil.ch](mailto:michel.jaboyedoff@unil.ch))

- [esurf-4-781-2016-supplement-title-page.pdf](#)
- [Draix Roubine- Fig\\_3.m4v](#)
- [supplementary\\_material\\_final\\_for\\_pub\\_2.pdf](#)

The copyright of individual parts of the supplement might differ from the CC-BY 3.0 licence.
